# Supplementary material
Source: PubMed Central journal article supplement (PMC8713546)
Supplement: 11427_2021_2031_MOESM1_ESM.pdf [file 11427_2021_2031_MOESM1_ESM.pdf]

**Supplementary Table 1. Compounds with antiSARS-CoV-2 activity**

| Pathway                                  | Molecular name                | Molecular Formula     | Target                                                        |
|------------------------------------------|-------------------------------|-----------------------|---------------------------------------------------------------|
| <b>RTK (FLT3 EGFR Akt MEK) inhibitor</b> |                               |                       |                                                               |
|                                          | Sunitinib                     | C22H27FN4O2           | VEGFR2(Flk-1), PDGFR $\beta$ , FLT3, c-Kit                    |
|                                          | Gilteritinib (ASP2215)        | C29H44N8O3            | FLT3, AXL                                                     |
|                                          | Sorafenib                     | C21H16ClF3N4O3        | Raf-1/B-Raf, VEGFR2/Flk1, B-Raf (V599E), PDGFR $\beta$        |
|                                          | Crizotinib                    | C21H22Cl2FN5O         | c-Met/ALK, ROS1                                               |
|                                          | (S)-crizotinib                | C21H22Cl2FN5O         | MTH1 (NUDT1)                                                  |
|                                          | Ceritinib                     | C28H36ClN5O3S         | ALK, Insulin Receptor, IGF-1R, STK22D, FLT3                   |
|                                          | pazopanib                     | C21H23N7O2S           | VEGFR1, VEGFR2, VEGFR3, PDGFR, c-Kit                          |
|                                          | ponatinib                     | C29H27F3N6O           | Abl, PDGFR $\alpha$ , VEGFR2, FGFR1, c-Src                    |
|                                          | Osimertinib (AZD9291)         | C28H33N7O2            | L858R/T790M EGFR, Exon 19 deletion EGFR, WT EGFR <sup>L</sup> |
|                                          | Osimertinib mesylate          | C29H37N7O5S           | EGFR                                                          |
|                                          | Dacomitinib                   | C24H25ClFN5O2         | EGFR, ErbB2, ErbB4                                            |
|                                          | Afatinib (BIBW2992) Dimaleate | C24H25ClFN5O3.2C4H4O4 | HER2, EGFR (L858R) , EGFR (wt) , EGFR (L858R/T790M)           |
|                                          | Olmutinib(HM61713)            | C26H26N6O2S           | mutant EGFR, BTK                                              |
|                                          | Bortezomib                    | C19H25BN4O4           | 20S proteasome, NF- $\kappa$ B                                |
|                                          | Bosutinib                     | C26H29Cl2N5O3         | Src/Abl, S6 kinase, ERK, STAT3                                |
|                                          | Carfilzomib (PR-171)          | C40H57N5O7            | proteasome                                                    |
|                                          | Perifosine(KRX-0401)          | C25H52NO4P            | Akt                                                           |
|                                          | Fangchinoline                 | C37H40N2O6            | Focal adhesion kinase (FAK)                                   |
|                                          | (+)-Fangchinoline             | C37H40N2O6            | Focal adhesion kinase (FAK)                                   |
|                                          | Nilotinib hydrochloride       | C28H22F3N7O.HCl       | Bcr-Abl                                                       |
|                                          | Cobimetinbi(GDC-0973)         | C21H21F3IN3O2         | MEK1                                                          |
|                                          | Berbamine                     | C37H40N2O6            | Bcr-Abl, NF- $\kappa$ B, CaMKII                               |
|                                          | Berbamine dihydrochloride     | C37H40N2O6.2HCl       | Bcr-Abl, NF- $\kappa$ B, CaMKII                               |

|                                                                            |                                                                 |                                                                    |
|----------------------------------------------------------------------------|-----------------------------------------------------------------|--------------------------------------------------------------------|
| Abemaciclib                                                                | C27H32F2N8                                                      | CDK4/ CDK6                                                         |
| <b>Na/K-ATPase inhibitor</b>                                               |                                                                 |                                                                    |
| Amiodarone HCl                                                             | C25H29I2NO3.HCl                                                 | Potassium channel                                                  |
| Ouabain                                                                    | C29H44O12.8H2O                                                  | Na <sup>+</sup> /K <sup>+</sup> -ATPase, $\alpha$ 3, $\alpha$ 2    |
| CB-5083                                                                    | C24H23N5O2                                                      | p97 AAA ATPase                                                     |
| Lanatoside C                                                               | C49H76O20                                                       |                                                                    |
| Digoxigenin                                                                | C <sub>23</sub> H <sub>34</sub> O <sub>5</sub>                  |                                                                    |
| <b>phospholipase A2 inhibitor</b>                                          |                                                                 |                                                                    |
| Quinacrine 2HCl                                                            | C23H30ClN3O.2HCl                                                | phospholipase A2                                                   |
| Tanshinone I                                                               | C18H12O3                                                        | phospholipase A2                                                   |
| <b>Histamine H1 receptor inhibitor</b>                                     |                                                                 |                                                                    |
| Ebastine                                                                   | C32H39NO2                                                       | H1-histamine receptor                                              |
| Terfenadine                                                                | C32H41NO2                                                       | H1 histamine receptor、caspase2, 4, 9, Ca <sup>2+</sup> homeostasis |
| <b>5-HT inhibitor, Dopamine receptor inhibitor, adrenoceptor inhibitor</b> |                                                                 |                                                                    |
| Sertraline HCl                                                             | C17H17Cl2N.HCl                                                  | 5-HT receptor                                                      |
| Perphenazine                                                               | C21H26ClN3OS                                                    | D1/D2 dopamine receptors                                           |
| Vortioxetine                                                               | C18H22N2S                                                       | 5-HT receptor                                                      |
| Vortioxetine (Lu AA21004)                                                  | C18H22N2S.HBr                                                   | SERT, 5-HT3A, 5-HT1A, 5-HT7, 5-HT1B                                |
| Chlorpromazine                                                             | C17H19ClN2S                                                     | 5-HT(2A) receptor / dopamine D2                                    |
| Pimavanserin                                                               | C50H68F2N6O4.C4H6O6                                             | 5-HT2A                                                             |
| Asenapine maleate                                                          | C17H16ClNO.C4H4O4                                               | 5-HT2C, 5-HT2A, 5-HT7, 5-HT2B, 5-HT6                               |
| Vilazodone HCl                                                             | C26H27N5O2.HCl                                                  | SSRI, 5-HT1A                                                       |
| Thioridazine hydrochloride                                                 | C21H26N2S2.HCl                                                  | 5-HT, Dopamine D2 receptor                                         |
| Trifluoperazine 2HCl                                                       | C21H24F3N3S.2HCl                                                | Dopamine D2 receptor                                               |
| Pimozide                                                                   | C <sub>28</sub> H <sub>29</sub> F <sub>2</sub> N <sub>3</sub> O | STAT3, STAT5, Dopamine receptors, 5-HT1A                           |

|                                 |                                                               |                                                    |
|---------------------------------|---------------------------------------------------------------|----------------------------------------------------|
| Azaperone                       | C19H22FN3O                                                    | Dopamine receptors                                 |
| Flupenthixol dihydrochloride    | C23H25F3N2OS.2HCl                                             | Dopamine D1/D2 receptor                            |
| Chlorpromazine HCl              | C17H19ClN2S.HCl                                               | Dopamine receptor,Potassium channel                |
| Prochlorperazine dimaleate salt | C20H24ClN3S.C8H8O8                                            | Dopamine D2 receptor                               |
| Penfluridol                     | C28H27ClF5NO                                                  | Dopamine receptor                                  |
| Dronedarone HCl                 | C31H44N2O5S.HCl                                               | Potassium channel, Sodium channel, Calcium channel |
| Dronedarone                     | C31H44N2O5S                                                   | Potassium channel, Sodium channel, Calcium channel |
| Nebivolol HCl                   | C22H25F2NO4.HCl                                               | $\beta$ 1-adrenoceptor                             |
| Carvedilol Phosphate            | C24H29N2O8P.1/2H2O                                            | $\beta$ / $\alpha$ -1 adrenoceptor                 |
| Reserpine                       | C <sub>33</sub> H <sub>40</sub> N <sub>2</sub> O <sub>9</sub> | vesicular monoamine transporter 2 (VMAT2)          |
| Teryzoline                      |                                                               |                                                    |

**Dihydrofolate reductase (DHFR) inhibitor**

|                       |                |                                |
|-----------------------|----------------|--------------------------------|
| Methotrexate          | C20H22N8O5     | Dihydrofolate reductase (DHFR) |
| Pralatrexate          | C23H23N7O5     | Dihydrofolate reductase (DHFR) |
| Methotrexate disodium | C20H20N8O5.2Na | Dihydrofolate reductase (DHFR) |

**TLR inhibitor**

|                            |                   |                |
|----------------------------|-------------------|----------------|
| Chloroquine phosphate      | C18H26ClN3.2H3O4P | TLRs, ATM      |
| Hydroxychloroquine Sulfate | C18H28ClN3O5S     | autophagy TLR9 |

**Selective estrogen receptor modulator**

|                      |                   |                   |
|----------------------|-------------------|-------------------|
| Bazedoxifene HCl     | C30H34N2O3.HCl    | Estrogen receptor |
| Clomifene citrate    | C26H28ClNO.C6H8O7 | Estrogen receptor |
| Bazedoxifene Acetate | C30H34N2O3.C2H4O2 | Estrogen receptor |
| Raloxifene           | C28H27NO4S        | Estrogen receptor |
| Tamoxifen Citrate    | C26H29NO.C6H8O7   | Estrogen receptor |

**NF- $\kappa$ B inhibitor**

|                                                                 |                                            |                                                     |
|-----------------------------------------------------------------|--------------------------------------------|-----------------------------------------------------|
| Quinacrine Dihydrochloride                                      | $C_{23}H_{32}Cl_3N_3O$                     | NF- $\kappa$ B                                      |
| (-)-Parthenolide                                                | C15H20O3                                   | NF- $\kappa$ B, HDAC1,MDM2 ubiquitination, p53      |
| Sanguinarine chloride                                           | C20H14NO4.Cl                               | protein phosphatase (PP) 2C                         |
| Sanguinarine                                                    | C20H14NO4                                  | NF- $\kappa$ B                                      |
| <b>Microsomal triglyceride transfer protein (MTP) inhibitor</b> |                                            |                                                     |
| Lomitapide Mesylate                                             | C40H41F6N3O5S                              | Microsomal triglyceride transfer protein (MTP)      |
| Lomitapide                                                      | C39H37F6N3O2                               | Microsomal triglyceride transfer protein (MTP)      |
| <b>Sphingosine 1-phosphate (S1P) antagonist</b>                 |                                            |                                                     |
| Fingolimod                                                      | C19H33NO2                                  | S1P receptor                                        |
| Fingolimod (FTY720)                                             | C19H33NO2.HCl                              | S1P receptor                                        |
| <b>AChR alpha-2 blocking agent</b>                              |                                            |                                                     |
| Cisatracurium Besylate                                          | C53H72N2O12.2C6H5O3S                       | Adrenergic Receptor                                 |
| <b>Antibacterial, antiviral, and antimalarial drugs</b>         |                                            |                                                     |
| Trimethoprim                                                    | C14H18N4O3                                 |                                                     |
| Sodium phytate hydrate                                          | $C_6H_{18}O_{24}P_6 \cdot xNa \cdot yH_2O$ |                                                     |
| Thioguanine                                                     | C5H5N5S                                    | DNMT1                                               |
| Acetylspiramycin                                                | C45H76N2O15                                |                                                     |
| Amodiaquine                                                     | C20H22ClN3O                                |                                                     |
| Amodiaquine hydrochloride                                       | C20H22ClN3O.2HCl                           |                                                     |
| Tilorone dihydrochloride                                        | C25H34N2O3.2HCl                            |                                                     |
| Selamectin                                                      | C43H63NO11                                 | Glutamate-gated chloride channels                   |
| Proflavine                                                      | C13H11N3                                   |                                                     |
| Salinomycin sodium salt                                         | $C_{42}H_69NaO_{11}$                       | Wnt/ $\beta$ -catenin, CK2 $\alpha$ , CK2 $\alpha'$ |
| Homoharringtonine                                               | C29H39NO9                                  |                                                     |
| Harringtonine                                                   | $C_{28}H_{37}NO_9$                         |                                                     |
| Harringtonine                                                   | $C_{16}H_{17}BrClN_3O_3$                   | prolyl-tRNA synthetase, Smad3                       |

Mefloquine HCl

C17H17ClF6N2O

Amsacrine hydrochloride

C21H20ClN3O3S

topo II

Orlistat

C29H53NO5

Lipase, Fatty acid synthesis

Methylene Blue

C16H18ClN3S

Guanylate cyclase, Tau aggregation

Ciclesonide

C32H44O7

---

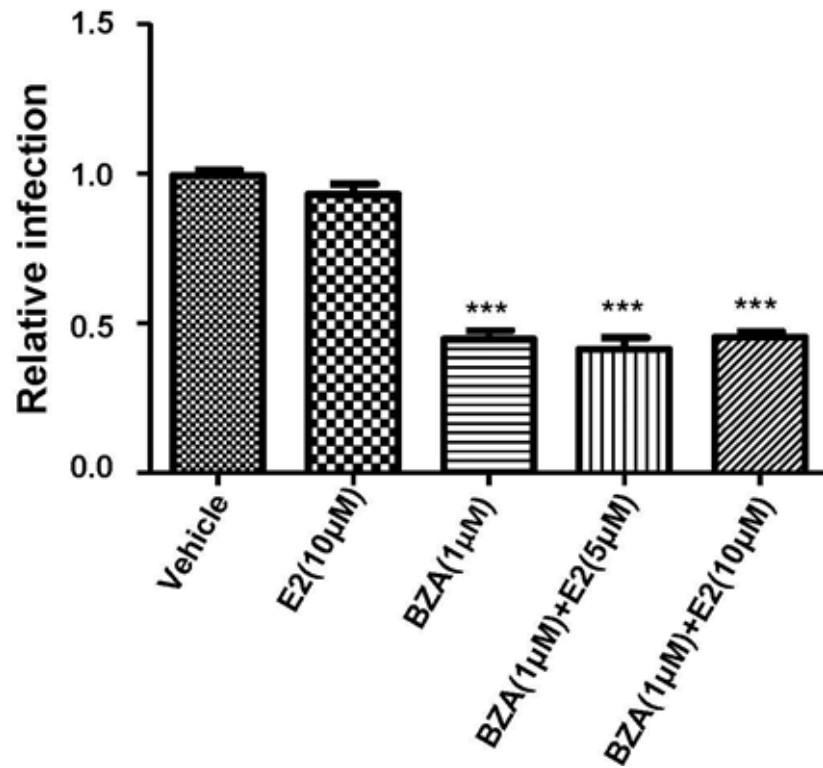

**Figure S1.** Estradiol (E2) does not reverse or promote the antiviral activity of bazedoxifene (BZA).  $1 \times 10^4$  Vero E6 cells were seeded in 96-well plates. 12 h later, E2 (10  $\mu$ M), BZA (1  $\mu$ M), BZA (1  $\mu$ M) + E2 (5  $\mu$ M) or BZA (1  $\mu$ M) + E2 (10  $\mu$ M) was added to the cell culture and then incubated with SARS-CoV-2 with an MOI of 0.1. The rate of SARS-CoV-2 infection was detected by immunofluorescence using an antibody against the nucleoprotein (NP) of SARS-CoV-2 at 24 h post-infection. Data are normalized to the average of DMSO-treated wells and represent the mean  $\pm$ SEM for  $n = 3$  independent experiments.

**A**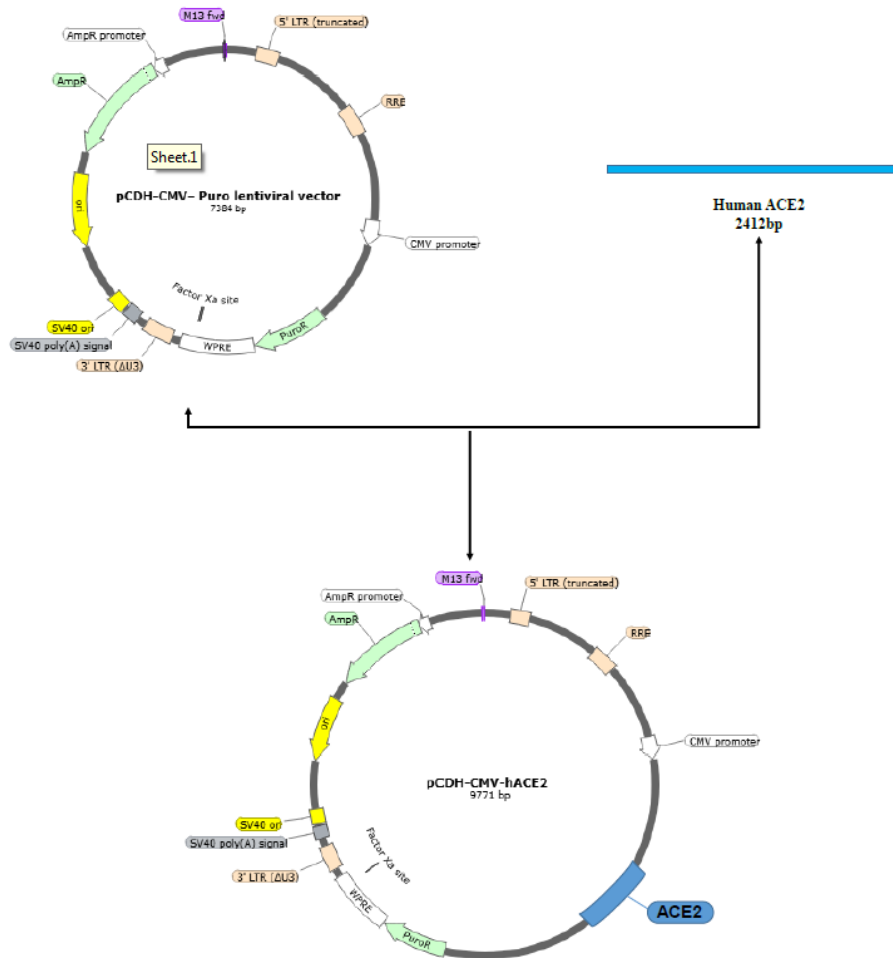**B**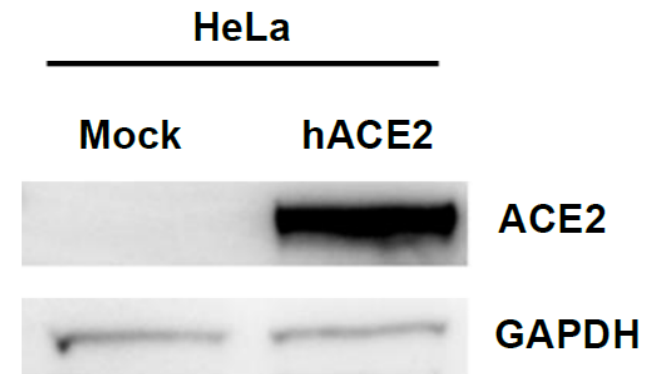

**Figure S2.** The construct of a human cervical carcinoma cell line stably expressing human ACE2 (HeLa-ACE2). A, A schematic of the constructing lentivirion carrying the humanACE2 gene. B, The expression of human ACE2 was confirmed by western blotting using rabbit anti-human ACE2 monoclonal antibody.
